# Supplementary material for: New Insights into Amino-Functionalization of Magnetic Nanoplatelets with Silanes and Phosphonates
Source: MDPI journal article supplement (doi:10.3390/nano12122123), 2022-06-20
Supplement: s1 [file s1]

# New Insights into Amino-Functionalization of Magnetic Nanoplatelets with Silanes and Phosphonates

Jelena Papan Djaniš <sup>1,2,\*</sup>, Griša Grigorij Prinčič <sup>3</sup>, Andraž Mavrič <sup>4</sup>, Alenka Mertelj <sup>5</sup>, Jernej Iskra <sup>3</sup> and Darja Lisjak <sup>1,\*</sup>

<sup>1</sup> Department for the Synthesis of Materials, Jožef Stefan Institute, 1000 Ljubljana, Slovenia

<sup>2</sup> Centre of Excellence for Photoconversion, Vinča Institute of Nuclear Sciences, National Institute of the Republic of Serbia, University of Belgrade, 11351 Belgrade, Serbia

<sup>3</sup> Department for Organic Chemistry, Faculty of Chemistry and Chemical Technology, University of Ljubljana, 1000 Ljubljana, Slovenia; grisa.grigorijprincic@fkkt.uni-lj.si (G.G.P.); jernej.iskra@fkkt.uni-lj.si (J.I.)

<sup>4</sup> Materials Research Laboratory, University of Nova Gorica, 5000 Nova Gorica, Slovenia; andraz.mavric@ung.si

<sup>5</sup> Department of Complex Matter, Jožef Stefan Institute, 1000 Ljubljana, Slovenia; alenka.mertelj@ijs.si

\* Correspondence: jelena.papan@ijs.si (J.P.D.); darja.lisjak@ijs.si (D.L.)

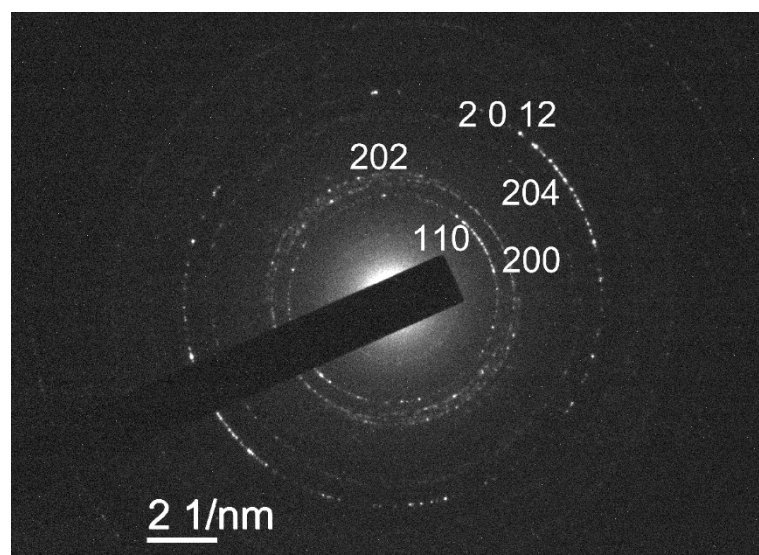

**Figure S1.** Selected-area electron diffraction (SAED) of the as-synthesized BSHF NPLs shown in Figure 1a. Indices correspond to the magnetoplumbite structure, space group P63/mmc (194).

The surface nominal fraction was calculated from the average size of nanoplatelet (around 50 nm) and thickness (4 nm).

$S_{tot}$  is a total surface of BSHF nanoplatelets;

$S_{nanoplatelet}$  is a surface of single nanoplatelet;

$N$  is a number of BSHF molecules;

$m_{tot}$  is a mass of NPLs core;

$m_{nanoplatelet}$  is a mass of single nanoplatelet,

$\rho$  is a density of BSHF ( $5.3 \times 10^3 \text{ kg m}^{-3}$ );  $r=25 \text{ nm}$  is the average radius of a BSHF;

$d = 4 \text{ nm}$  the average height of BSHF;

$V$  is volume;

$N_L$  is a total number of ligand molecules at surface of NPLs core;

$n_L$  are moles of ligand;

$M_L$  is a molar mass of ligand;

$m_L$  is a mass of added ligand.

$$S_{tot} = N \times S_{nanoplatelet} \quad (S1)$$

$$N = \frac{m_{tot}}{m_{nanoplatelet}} \quad (S2)$$

$$m_{nanoplatelet} = \rho \times V = 5.3 \times 10^3 kgm^{-1} \times \pi r^2 d \quad (S3)$$

$$S_{nanoplatelet} = 2r^2\pi + 2r\pi d \quad (S4)$$

If we add  $\beta$  molecules/ nm<sup>2</sup>:

$$N_L = \beta \times S_{tot} \quad (S5)$$

$$n_L = \frac{N_L}{N_{NA}} \quad (S6)$$

$$m_L = n_L \times M_L \quad (S7)$$
